# Supplementary material for: Association between Malnutrition Assessed by the Global Leadership Initiative on Malnutrition Criteria and Mortality in Older People: A Scoping Review
Source: MDPI journal article supplement (doi:10.3390/ijerph20075320), 2023-03-30
Supplement: s1 [file s1]

**Table S2.** Search strategy.

|                                                                                                                                                                                                                                                                                                                                                                                                                                                                                                                                                                                                                                                                                                         |
|---------------------------------------------------------------------------------------------------------------------------------------------------------------------------------------------------------------------------------------------------------------------------------------------------------------------------------------------------------------------------------------------------------------------------------------------------------------------------------------------------------------------------------------------------------------------------------------------------------------------------------------------------------------------------------------------------------|
| <b>Pubmed</b>                                                                                                                                                                                                                                                                                                                                                                                                                                                                                                                                                                                                                                                                                           |
| Search: ((glim criteria) AND (older people)) OR ((glim criteria) AND (mortality))                                                                                                                                                                                                                                                                                                                                                                                                                                                                                                                                                                                                                       |
| ("glim"[All Fields] AND ("criteria s"[All Fields] OR "criterias"[All Fields] OR "standards"[MeSH Subheading] OR "standards"[All Fields] OR "criteria"[All Fields]) AND (("older"[All Fields] OR "olders"[All Fields]) AND ("people s"[All Fields] OR "peopled"[All Fields] OR "peopling"[All Fields] OR "persons"[MeSH Terms] OR "persons"[All Fields] OR "people"[All Fields] OR "peoples"[All Fields]))) OR ("glim"[All Fields] AND ("criteria s"[All Fields] OR "criterias"[All Fields] OR "standards"[MeSH Subheading] OR "standards"[All Fields] OR "criteria"[All Fields]) AND ("mortality"[MeSH Terms] OR "mortality"[All Fields] OR "mortalities"[All Fields] OR "mortality"[MeSH Subheading])) |
| <b>Translations</b>                                                                                                                                                                                                                                                                                                                                                                                                                                                                                                                                                                                                                                                                                     |
| <b>criteria:</b> "criteria's"[All Fields] OR "criterias"[All Fields] OR "standards"[Subheading] OR "standards"[All Fields] OR "criteria"[All Fields]                                                                                                                                                                                                                                                                                                                                                                                                                                                                                                                                                    |
| <b>older:</b> "older"[All Fields] OR "olders"[All Fields]                                                                                                                                                                                                                                                                                                                                                                                                                                                                                                                                                                                                                                               |
| <b>people:</b> "people's"[All Fields] OR "peopled"[All Fields] OR "peopling"[All Fields] OR "persons"[MeSH Terms] OR "persons"[All Fields] OR "people"[All Fields] OR "peoples"[All Fields]                                                                                                                                                                                                                                                                                                                                                                                                                                                                                                             |
| <b>criteria:</b> "criteria's"[All Fields] OR "criterias"[All Fields] OR "standards"[Subheading] OR "standards"[All Fields] OR "criteria"[All Fields]                                                                                                                                                                                                                                                                                                                                                                                                                                                                                                                                                    |
| <b>mortality:</b> "mortality"[MeSH Terms] OR "mortality"[All Fields] OR "mortalities"[All Fields] OR "mortality"[Subheading]                                                                                                                                                                                                                                                                                                                                                                                                                                                                                                                                                                            |
| <b>Scopus</b>                                                                                                                                                                                                                                                                                                                                                                                                                                                                                                                                                                                                                                                                                           |
| <b>Cochrane Database for Systematic Reviews (CDSR)</b>                                                                                                                                                                                                                                                                                                                                                                                                                                                                                                                                                                                                                                                  |
